# Supplementary material
Source: HighWire-hosted journal article supplement (https://bjsm.bmj.com/content/bjsports-2022-105583)
Supplement: inline-supplementary-material-2 [file inline-supplementary-material-2.pdf]

**Supplementary Table 2.** Reason for exclusion at full-text screening.

| Study                                                                                                                                                                                                                                                                                                                      | Reason                            |
|----------------------------------------------------------------------------------------------------------------------------------------------------------------------------------------------------------------------------------------------------------------------------------------------------------------------------|-----------------------------------|
| Bestilleiro et al. Incidence of COVID-19 in Children and Young People Who Play Federated Football. <i>Sports Health</i> . 2022 Jan-Feb;14(1):99-102.                                                                                                                                                                       | No outcomes of interest           |
| De Polo et. al. Halting the pandemic outside 'CORTINA2021' alpine world ski championships: a challenge for sport and public health in times of COVID-19. <i>J Public Health (Oxf)</i> . 2021;fdab351.                                                                                                                      | Wrong population                  |
| Dougherty et. al. SARS-CoV-2 B.1.617.2 (Delta) Variant COVID-19 Outbreak Associated with a Gymnastics Facility - Oklahoma, April-May 2021. <i>MMWR Morb Mortal Wkly Rep</i> . 2021;70(28):1004-1007.                                                                                                                       | No outcomes of interest           |
| Greenshields et. al. Positive SARS-CoV-2 Diagnosis Has Modest Effects On Resting Indices Of Cardiac Conduction And Repolarization In Division-I NCAA Athletes. <i>ACSM 2021 Annual Meeting</i> .                                                                                                                           | Conference abstract               |
| Hassanmirzaei et. al. Resumption of professional football during the COVID-19 pandemic. Study findings from Iran. <i>Ger J Exerc Sport Res</i> (2021).                                                                                                                                                                     | No outcomes of interest           |
| Hassanmirzaei et al. SARS-CoV-2 serological assay and viral testing: a report of professional football setting. <i>Postgrad Med J</i> . 2021 Apr 30;postgradmedj-2021-140176.                                                                                                                                              | No outcomes of interest           |
| Hertel et. al. Athletes Drive Distinctive Trends of COVID-19 Infection in a College Campus Environment. <i>Int J Environ Res Public Health</i> . 2021;18(14):7689.                                                                                                                                                         | No outcomes of interest           |
| Kim et al. Post COVID-19 cardiovascular evaluation in NCAA Division I athletes. <i>AMSSM 30<sup>th</sup> Annual Meeting (Virtual)</i> .                                                                                                                                                                                    | Conference abstract               |
| Kiss et al. Cardiopulmonary examinations of athletes returning to high-intensity sport activity following SARS-CoV-2 infection. <i>ESC Congress 2021</i> .                                                                                                                                                                 | Conference abstract               |
| Lakatos et al. Frequent constriction-like echocardiographic findings in elite athletes following mild COVID-19: in the grasp of SARS-CoV-2? <i>ESC Congress 2021</i> .                                                                                                                                                     | Conference abstract               |
| Mack et al. SARS-CoV-2 transmission risk among national basketball association players, staff, and vendors exposed to individuals with positive test results after COVID-19 recovery during the 2020 regular and postseason. <i>JAMA Intern Med</i> . 2021 Jul 1;181(7):960-966.                                           | Wrong population                  |
| Mack et al. Prevalence of SARS-CoV-2 IgG antibodies in a large prospective cohort study of elite football players in Germany (May-June 2020): implications for a testing protocol in asymptomatic individuals and estimation of the rate of undetected cases. <i>Clin Microbiol Infect</i> . 2021 Mar;27(3):473.e1-473.e4. | No outcomes of interest           |
| Małek ŁA, Marczak M, Miłosz-Wieczorek B, Konopka M, Braksator W, Drygas W, Krzywański J. Cardiac involvement in consecutive elite athletes recovered from Covid-19: A magnetic resonance study. <i>J Magn Reson Imaging</i> . 2021 Jun;53(6):1723-1729.                                                                    | Possible overlapping participants |
| Milburn et al. Characterization of D1 athletes with COVID-19 undergoing cardiac clearance. <i>2021 AMSSM 30<sup>th</sup> Annual Meeting (Virtual)</i> .                                                                                                                                                                    | Conference abstract               |
| Mitrani et al. Risk of sudden cardiac death in competitive athletes during the convalescent phase following COVID-19 infection. <i>Heart Rhythm</i> 2021, July 28-31, Boston, USA.                                                                                                                                         | Conference abstract               |

|                                                                                                                                                                                                                                                                                                                                                            |                         |
|------------------------------------------------------------------------------------------------------------------------------------------------------------------------------------------------------------------------------------------------------------------------------------------------------------------------------------------------------------|-------------------------|
| Moreno et al. Severe Acute Respiratory Syndrome Coronavirus 2 transmission in intercollegiate athletics not fully mitigated with daily antigen testing. <i>Clin Infect Dis</i> . 2021 Jul 15;73(Suppl 1):S45-S53.                                                                                                                                          | No outcomes of interest |
| Moulson et al. Subclinical COVID-19 cardiac imaging findings: resurgence of the athletic "Grey-Zone". <i>JACC Cardiovasc Imaging</i> . 2021 Mar;14(3):556-558.                                                                                                                                                                                             | Editorial               |
| Navia et al. Return to play timeline post COVID-19 infection in NCAA Division I athletes. 2021 AMSSM 30 <sup>th</sup> Annual Meeting (Virtual).                                                                                                                                                                                                            | Conference abstract     |
| Norton et al. Clinical outcomes of COVID-19 in athletes at two NCAA Division II colleges in South Carolina. AMSSM 30 <sup>th</sup> Annual Meeting (Virtual).                                                                                                                                                                                               | Conference abstract     |
| Ogasawara et al. Successful reboot of high-performance sporting activities by Japanese national women's handball team in Tokyo, 2020 during the COVID-19 pandemic: An initiative using the Japan Sports-Cyber Physical System (JS-CPS) of the Sports Research Innovation Project (SRIP). <i>Int J Environ Res Public Health</i> . 2021 Sep 18;18(18):9865. | Wrong population        |
| Šarčević et al. Increased number of electrocardiogram findings requiring additional cardiac examination in young athletes during the coronavirus disease 2019 pandemic: a case series. <i>J Int Med Res</i> . 2021 Oct;49(10):3000605211053280.                                                                                                            | No outcomes of interest |
| Sarma et al. Cardiac involvement in athletes recovering from COVID-19: A reason for hope. <i>Circulation</i> . 2021 Jul 27;144(4):267-270.                                                                                                                                                                                                                 | Editorial               |
| Sasser et al. Reported COVID-19 incidence in Wisconsin high school athletes in fall 2020. <i>J Athl Train</i> . 2021 Jun 15.                                                                                                                                                                                                                               | No outcomes of interest |
| Tejtel et al. Sports clearance following SARS-CoV-2 infection in children: Does noninvasive testing predict abnormal cardiac MRI? ACC 70th Annual Scientific Session, Atlanta, USA.                                                                                                                                                                        | Conference abstract     |
| Termansen et al. SARS-CoV-2 prevalence and transmission in swimming activities: Results from a retrospective cohort study. <i>Scand J Med Sci Sports</i> . 2022 Jan;32(1):242-254.                                                                                                                                                                         | No outcomes of interest |
| Toresdahl et al. Increased incidence of injury among runners with COVID-19. <i>Sports Health</i> . 2021 Dec 14:19417381211061144.                                                                                                                                                                                                                          | Wrong population        |
| Watson et al. The association of COVID-19 incidence with sport and face mask use in United States high school athletes. <i>J Athl Train</i> . 2021 Nov 18.                                                                                                                                                                                                 | No outcomes of interest |
| Watson et al. COVID-19 risk in youth club sports: A nationwide sample representing over 200,000 athletes. AMSSM 30 <sup>th</sup> Annual Meeting (Virtual).                                                                                                                                                                                                 | Conference abstract     |
| Wyatt et al. Comparison of acute Covid19 infected athletes to controls through electrocardiography. ACSM 2021 Annual Meeting.                                                                                                                                                                                                                              | Conference abstract     |
| Yashio et al. COVID-19 infection during the Olympic and Paralympic Games Tokyo 2020. <i>Travel Med Infect Dis</i> . 2021 Nov-Dec;44:102205.                                                                                                                                                                                                                | No outcomes of interest |

ESC, European Society of Cardiology; AMSSM, American Medical Society for Sports Medicine; ACC, American College of Cardiology; ACSM, American College of Sports Medicine;
