# Supplementary material
Source: HighWire-hosted journal article supplement (https://bjsm.bmj.com/content/bjsports-2022-105583)
Supplement: inline-supplementary-material-3 [file inline-supplementary-material-3.pdf]

**Supplementary Table 3.** Characteristics of included studies (continue).

| Study, year      | Country   | Sample size<br>(Infected athletes) | Age, years <sup>a</sup>    | Sex <sup>a</sup>         | Skill level                 | Sport modality                                                                                                                                                                                             | Period of data<br>collection | COVID-19                    |                       |
|------------------|-----------|------------------------------------|----------------------------|--------------------------|-----------------------------|------------------------------------------------------------------------------------------------------------------------------------------------------------------------------------------------------------|------------------------------|-----------------------------|-----------------------|
|                  |           |                                    |                            |                          |                             |                                                                                                                                                                                                            |                              | Diagnosis                   | Severity <sup>b</sup> |
| Anastasio, 2021  | Italy     | 13                                 | Mean ± SD<br>21.0 ± 5.0    | Male = 10<br>Female = 3  | Elite                       | Cross-country skiing                                                                                                                                                                                       | Oct to Nov/20                | PCR                         | NR                    |
| Andrianova, 2021 | Russia    | 7                                  | NR                         | All female               | Elite                       | Basketball                                                                                                                                                                                                 | Sep/20 to Jan/21             | PCR                         | NR                    |
| Atherstone, 2021 | USA       | 458                                | NR                         | NR                       | College/Uni<br>versity      | Football, Track and<br>field/Cross country,<br>Soccer, Basketball,<br>Volleyball,<br>Swimming and<br>diving, Baseball,<br>Wrestling, Golf,<br>Gymnastics, Softball,<br>Lacrosse, Tennis,<br>Rowing, Others | Jun to Oct/20                | RT-PCR                      | N/A                   |
| Babszky, 2021    | Hungary   | 20                                 | Mean ± SD<br>24.1 ± 4.7    | Male = 16<br>Female = 4  | Elite                       | NR                                                                                                                                                                                                         | NR                           | PCR                         | NIH                   |
| Brito, 2020      | USA       | 54                                 | Median<br>19               | Male = 46<br>Female = 8  | College                     | Football, Basketball,<br>Volleyball, Soccer,<br>Swimming, Others                                                                                                                                           | Jun to Aug/20                | Real-time<br>PCR and<br>IgG | CDC/NIH               |
| Cafiero, 2021    | Italy     | 45                                 | Mean ± SD<br>14.0 ± 1.9    | Male = 26<br>Female = 19 | Collegiate/A<br>mateur      | NR                                                                                                                                                                                                         | Oct/20 to<br>Feb/21          | PCR                         | NIH                   |
| Cavigli, 2021    | Italy     | 90                                 | Mean ± SD<br>24.0 ± 10.0   | Male = 64<br>Female = 26 | Professional<br>and amateur | Mixed sports                                                                                                                                                                                               | NR                           | NR                          | NR                    |
| Çelik, 2021      | Turkey    | 17                                 | Mean ± SD<br>23.5 ± 5.9    | All female               | Elite                       | Volleyball                                                                                                                                                                                                 | NR                           | PCR                         | N/A                   |
| Clark, 2021      | USA       | 59                                 | Median (IQR)<br>20 (19-21) | Male = 22<br>Female = 37 | College                     | 9 different sports                                                                                                                                                                                         | NR                           | NR                          | NR                    |
| Costello, 2022   | Australia | 16                                 | Mean ± SD<br>25.0 ± 6.0    | Male = 12<br>Female = 4  | Professional                | Basketball                                                                                                                                                                                                 | NR                           | PCR                         | NR                    |

NR, not reported; N/A, not applicable; NIH, National Institute of Health classification; CDC, Center for Disease Control and Prevention; AMSSM, American Medical Society for Sports Medicine; ACC, American College of Cardiology; RT-PCR, reverse transcription-polymerase chain reaction; <sup>a</sup> Characteristics of infected participants; <sup>b</sup> Criteria used to classify disease severity (i.e., mild, moderate, severe).

**Supplementary Table 3.** Characteristics of included studies (continued).

| Study, year          | Country | Sample size<br>(Infected athletes) | Age, years <sup>a</sup>      | Sex <sup>a</sup>           | Skill level                                                    | Sport modality                                                                                                                                                      | Period of data<br>collection | COVID-19                         |                       |
|----------------------|---------|------------------------------------|------------------------------|----------------------------|----------------------------------------------------------------|---------------------------------------------------------------------------------------------------------------------------------------------------------------------|------------------------------|----------------------------------|-----------------------|
|                      |         |                                    |                              |                            |                                                                |                                                                                                                                                                     |                              | Diagnosis                        | Severity <sup>b</sup> |
| Csulak 2021          | Hungary | 14                                 | Mean ± SD<br>23.0 ± 3.8      | Male = 7<br>Female = 7     | Elite                                                          | Swimming                                                                                                                                                            | 2021                         | RT-PCR<br>and<br>antibody        | NR                    |
| Daniels 2021         | USA     | 1597                               | NR                           | Male = 964<br>Female = 633 | University                                                     | NR                                                                                                                                                                  | Mar to Dec/20                | PCR                              | N/A                   |
| Egger 2021           | Germany | 18                                 | Mean ± SD<br>17.6 ± 3.1      | NR                         | Professional,<br>semi-<br>professional<br>and youth<br>academy | Soccer                                                                                                                                                              | Aug to Sep/20                | RT-PCR                           | N/A                   |
| Erickson, 2021       | USA     | 170                                | Mean ± SD<br>19.6 ± 1.5      | Male = 91<br>Female = 79   | College/Uni<br>versity                                         | Soccer, Hockey,<br>Tennis, Football,<br>Track, Volleyball,<br>Gymnastics,<br>Wrestling,<br>Swimming, Lacrosse,<br>Cross Country,<br>Baseball, Basketball,<br>Others | Aug to Dec/20                | NR                               | NR                    |
| Fikenzer, 2021       | Germany | 8                                  | Mean ± SD<br>27.0 ± 3.5      | All male                   | Elite                                                          | Handball                                                                                                                                                            | 2020                         | Real time<br>RT-PCR              | NIH                   |
| Gervasi, 2021        | Italy   | 18                                 | Median (IQR)<br>22 (21-27)   | All male                   | Professional                                                   | Soccer                                                                                                                                                              | NR                           | Real time<br>PCR and<br>Antibody | NR                    |
| Gualano, 2021        | Brazil  | 501                                | Mean ± SD<br>23.0 ± 4.6      | Male = 447<br>Female = 54  | Professional                                                   | Soccer                                                                                                                                                              | Jul to Dec/20                | RT-PCR                           | NR                    |
| Hendrickson,<br>2021 | USA     | 137                                | Median (range)<br>20 (18–27) | Male = 93<br>Female = 44   | College                                                        | Football, Dance,<br>Basketball, Baseball,<br>Tennis, Softball,<br>Soccer, Cheer, Track,<br>Volleyball, Golf                                                         | Jul to Oct/20                | RT-PCR                           | NR                    |

NR, not reported; N/A, not applicable; NIH, National Institute of Health classification; CDC, Center for Disease Control and Prevention; AMSSM, American Medical Society for Sports Medicine; ACC, American College of Cardiology; RT-PCR, reverse transcription-polymerase chain reaction; <sup>a</sup> Characteristics of infected participants; <sup>b</sup> Criteria used to classify disease severity (i.e., mild, moderate, severe).

**Supplementary Table 3.** Characteristics of included studies (continued).

| Study, year     | Country | Sample size<br>(Infected athletes) | Age, years <sup>a</sup>        | Sex <sup>a</sup>          | Skill level                                            | Sport modality                                                                                                                                                                                                  | Period of data<br>collection | COVID-19                                                   |                       |
|-----------------|---------|------------------------------------|--------------------------------|---------------------------|--------------------------------------------------------|-----------------------------------------------------------------------------------------------------------------------------------------------------------------------------------------------------------------|------------------------------|------------------------------------------------------------|-----------------------|
|                 |         |                                    |                                |                           |                                                        |                                                                                                                                                                                                                 |                              | Diagnosis                                                  | Severity <sup>b</sup> |
| Hull, 2021      | UK      | 147                                | Mean ± SD<br>24.7 ± 5.2        | Male = 92<br>Female = 55  | Elite                                                  | Summer, winter,<br>able-bodied, and<br>paralympic sports                                                                                                                                                        | Feb/20 to Jan/21             | PCR,<br>antibody and<br>consistent<br>clinical<br>features | NR                    |
| Hwang, 2021     | USA     | 55                                 | NR                             | NR                        | College                                                | NR                                                                                                                                                                                                              | Jun to Oct/20                | PCR and<br>antibody                                        | NR                    |
| Jones, 2021     | UK      | 14                                 | NR                             | All male                  | Professional                                           | Rugby                                                                                                                                                                                                           | Jul to Oct/20                | RT-PCR                                                     | N/A                   |
| Komici, 2021    | Italy   | 24                                 | Median (IQR)<br>23.5 (20-25.5) | NR                        | Amateur                                                | Soccer                                                                                                                                                                                                          | NR                           | RT-PCR                                                     | N/A                   |
| Krzywański 2022 | Poland  | 111                                | Mean ± SD<br>22.0 ± 5.0        | Male = 52<br>Female = 59  | Elite                                                  | Wrestling, Judo,<br>Track and Field,<br>Sprinting, Throwing,<br>Middle distance<br>running, Cycling,<br>Speed Skating, Cross<br>Country Skiing,<br>Swimming, Handball,<br>Beach Volleyball,<br>Fencing, Curling | Jul to Oct/20                | RT-PCR                                                     | NR                    |
| Kuitunen, 2021  | Finland | 50                                 | U-20 and 3<br>seniors          | All male                  | Amateur                                                | Ice Hockey                                                                                                                                                                                                      | Sep/20                       | PCR                                                        | N/A                   |
| Lopes, 2021     | Brazil  | 35                                 | Median<br>27                   | NR                        | Professional,<br>college/univ<br>ersity and<br>amateur | NR                                                                                                                                                                                                              | Aug to Nov/20                | NR                                                         | N/A                   |
| Martinez, 2021  | USA     | 789                                | Mean (range)<br>25 (19-41)     | Male = 777<br>Female = 12 | Professional                                           | Basketball, Soccer,<br>Baseball, Hockey,<br>Football                                                                                                                                                            | May and Oct/20               | PCR and<br>antibody                                        | NR                    |
| Mascia, 2021    | Italy   | 13                                 | NR                             | All male                  | Elite                                                  | Soccer                                                                                                                                                                                                          | Mar to Jun/20                | RT-PCR                                                     | N/A                   |

NR, not reported; N/A, not applicable; NIH, National Institute of Health classification; CDC, Center for Disease Control and Prevention; AMSSM, American Medical Society for Sports Medicine; ACC, American College of Cardiology; RT-PCR, reverse transcription-polymerase chain reaction; <sup>a</sup> Characteristics of infected participants; <sup>b</sup> Criteria used to classify disease severity (i.e., mild, moderate, severe).

**Supplementary Table 3.** Characteristics of included studies (continued).

| Study, year      | Country   | Sample size<br>(Infected athletes) | Age, years <sup>a</sup> | Sex <sup>a</sup>                  | Skill level            | Sport modality                                                                                                                                                                                                                                                                                                                                          | Period of data<br>collection | COVID-19                        |                       |
|------------------|-----------|------------------------------------|-------------------------|-----------------------------------|------------------------|---------------------------------------------------------------------------------------------------------------------------------------------------------------------------------------------------------------------------------------------------------------------------------------------------------------------------------------------------------|------------------------------|---------------------------------|-----------------------|
|                  |           |                                    |                         |                                   |                        |                                                                                                                                                                                                                                                                                                                                                         |                              | Diagnosis                       | Severity <sup>b</sup> |
| Meyer, 2021      | Germany   | 10                                 | NR                      | All male                          | Professional           | Soccer                                                                                                                                                                                                                                                                                                                                                  | May to Jul/20                | RT-PCR and<br>antibody          | N/A                   |
| Milovancev, 2021 | Serbia    | 16                                 | Mean ± SD<br>24.0 ± 4.5 | All male                          | Professional           | Volleyball                                                                                                                                                                                                                                                                                                                                              | NR                           | PCR                             | NR                    |
| Moulson, 2021    | USA       | 3018                               | Mean ± SD<br>20.0 ± 1.0 | Male = 2061<br>Female = 957       | College/Uni<br>versity | Football, Baseball,<br>Track and<br>Field/Cross Country,<br>Lacrosse, Basketball,<br>Swimming/Diving,<br>Soccer,<br>Cheerleading/Dance,<br>Volleyball, Softball,<br>Golf, Wrestling,<br>Tennis, Crew,<br>Gymnastics, Ice<br>Hockey, Equestrian,<br>Field Hockey, Rugby,<br>Fencing, Water Polo,<br>Sailing, Squash,<br>Skiing, Synchronized<br>Swimming | Sep to Dec/20                | PCR,<br>antibody and<br>antigen | AMSSM/<br>ACC         |
| Pedersen, 2021   | Denmark   | 4                                  | NR                      | All male                          | Professional           | Soccer                                                                                                                                                                                                                                                                                                                                                  | May to Jul/20                | Real time<br>PCR                | NR                    |
| Peidro, 2021     | Argentina | 24                                 | Mean ± SD<br>27.1 ± 5.1 | All male                          | Professional           | Soccer                                                                                                                                                                                                                                                                                                                                                  | NR                           | RT-PCR                          | NR                    |
| Petek, 2021      | USA       | 3597                               | Mean ± SD<br>20.0 ± 1.0 | Male = 2,374<br>Female =<br>1,223 | College/Uni<br>versity | 26 distinct sporting<br>disciplines                                                                                                                                                                                                                                                                                                                     | Sep/20 to<br>May/21          | PCR,<br>antigen or<br>antibody  | N/A                   |
| Rajpal, 2021     | USA       | 26                                 | Mean ± SD<br>19.5 ± 1.5 | Male = 15<br>Female = 11          | College                | Football, Soccer,<br>Lacrosse, Basketball,<br>Track                                                                                                                                                                                                                                                                                                     | Jun to Aug/20                | RT-PCR                          | NR                    |

NR, not reported; N/A, not applicable; NIH, National Institute of Health classification; CDC, Center for Disease Control and Prevention; AMSSM, American Medical Society for Sports Medicine; ACC, American College of Cardiology; RT-PCR, reverse transcription-polymerase chain reaction; <sup>a</sup> Characteristics of infected participants; <sup>b</sup> Criteria used to classify disease severity (i.e., mild, moderate, severe).

**Supplementary Table 3.** Characteristics of included studies (continued).

| Study, year         | Country                                 | Sample size<br>(Infected athletes) | Age, years <sup>a</sup>           | Sex <sup>a</sup>                                                                        | Skill level                                                | Sport modality      | Period of data<br>collection | COVID-19                                   |                       |
|---------------------|-----------------------------------------|------------------------------------|-----------------------------------|-----------------------------------------------------------------------------------------|------------------------------------------------------------|---------------------|------------------------------|--------------------------------------------|-----------------------|
|                     |                                         |                                    |                                   |                                                                                         |                                                            |                     |                              | Diagnosis                                  | Severity <sup>b</sup> |
| Robinson, 2021      | PGA<br>European<br>Tour                 | 4                                  | NR                                | All male                                                                                | Professional                                               | Golf                | Jul to Dec/20                | RT-PCR                                     | N/A                   |
| Schreiber, 2021     | Germany                                 | 62                                 | NR                                | NR                                                                                      | Professional,<br>amateur and<br>youth                      | Soccer              | Aug/20 to<br>Mar/21          | PCR                                        | N/A                   |
| Schumacher,<br>2021 | Qatar                                   | 36                                 | NR                                | All male                                                                                | Professional                                               | Soccer              | Jun to Sep/20                | PCR                                        | N/A                   |
| Schwellnus, 2021    | Multicentre (led by<br>South<br>Africa) | 45                                 | Mean $\pm$ SD<br>32.6 $\pm$ 14.0  | Male = 18<br>Female = 27                                                                | Professional<br>(31.1%)                                    | NR                  | Jul to Oct/20                | PCR,<br>antibody,<br>clinical<br>diagnosis | N/A                   |
| Shah, 2021          | USA                                     | 15                                 | NR                                | NR                                                                                      | Elite                                                      | NR                  | Jul to Oct/20                | PCR and<br>antibody                        | N/A                   |
| Spinicci, 2021      | Italy                                   | 7                                  | NR                                | NR                                                                                      | Professional                                               | Soccer              | Mar/20 to<br>Feb/21          | RT-PCR                                     | NR                    |
| Starekova, 2021     | USA                                     | 145                                | Mean (age<br>range)<br>20 (17-23) | Male = 108<br>Female = 37                                                               | College/University<br>(competitive<br>student<br>athletes) | 12 sport modalities | Jan to Nov/20                | RT-PCR                                     | NR                    |
| Teran, 2020         | USA                                     | 17                                 | NR                                | Male and<br>female<br>athletes<br>(numbers not<br>reported for<br>infected<br>athletes) | University                                                 | Soccer              | Jul to Aug/20                | Real time<br>RT-PCR                        | N/A                   |
| Vago, 2021          | Hungary                                 | 12                                 | Median (IQR)<br>23 (20-23)        | Male = 2<br>Female = 10                                                                 | Elite                                                      | Mixed sports        | NR                           | PCR                                        | N/A                   |

NR, not reported; N/A, not applicable; NIH, National Institute of Health classification; CDC, Center for Disease Control and Prevention; AMSSM, American Medical Society for Sports Medicine; ACC, American College of Cardiology; RT-PCR, reverse transcription-polymerase chain reaction; <sup>a</sup> Characteristics of infected participants; <sup>b</sup> Criteria used to classify disease severity (i.e., mild, moderate, severe).
