# Supplementary material
Source: HighWire-hosted journal article supplement (https://bjsm.bmj.com/content/bjsports-2022-105583)
Supplement: inline-supplementary-material-5 [file inline-supplementary-material-5.pdf]

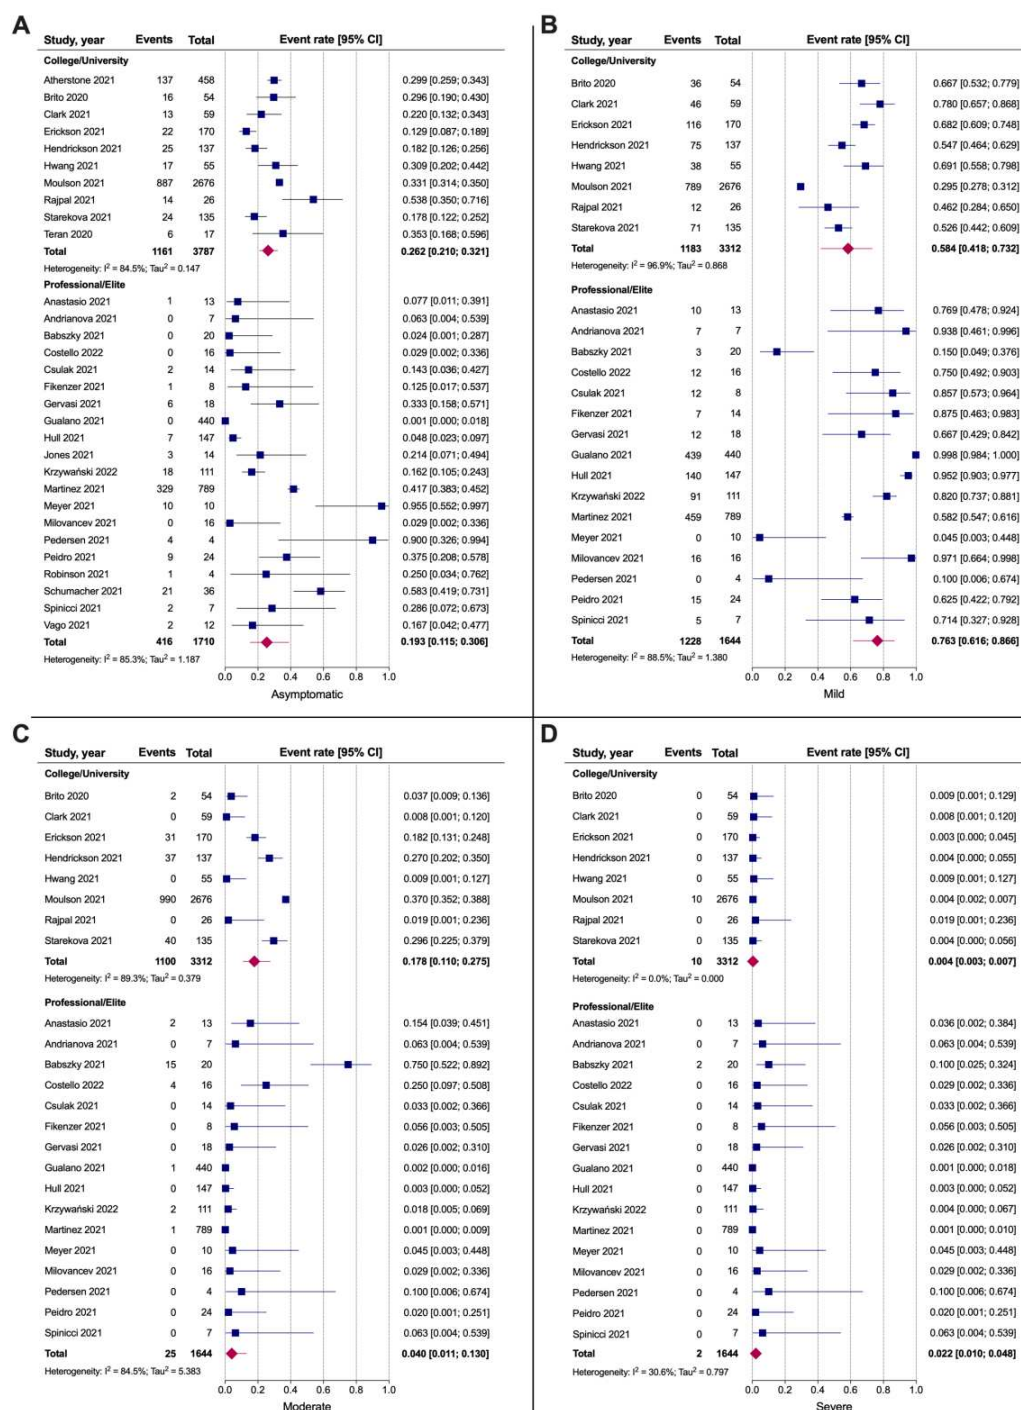

**Supplementary Figure 2.** Sensitivity analysis with pooled event rate [95% CI] for asymptomatic (A), mild (B), moderate (C), and severe (D) COVID-19 in athletes, according to competitive level.
