# Supplementary material
Source: HighWire-hosted journal article supplement (https://bjsm.bmj.com/content/bjsports-2022-105583)
Supplement: inline-supplementary-material-10 [file inline-supplementary-material-10.pdf]

**Supplementary Table 9.** Type of post-acute COVID-19 symptoms.

| Study, year       | Type of symptoms                                                                                                                                                                                                                                                                                                                                                                                                                                                                                                                                         |
|-------------------|----------------------------------------------------------------------------------------------------------------------------------------------------------------------------------------------------------------------------------------------------------------------------------------------------------------------------------------------------------------------------------------------------------------------------------------------------------------------------------------------------------------------------------------------------------|
| Caffero, 2021     | No case of long COVID was found.                                                                                                                                                                                                                                                                                                                                                                                                                                                                                                                         |
| Erickson, 2021    | 16 (9.4%) athletes had symptoms at the time of examination.<br>Mean $\pm$ SD time between positive test result and medical screening: 22.5 $\pm$ 14.2                                                                                                                                                                                                                                                                                                                                                                                                    |
| Gervasi, 2021     | All athletes were asymptomatic for COVID-19-related symptoms at the time of screening.                                                                                                                                                                                                                                                                                                                                                                                                                                                                   |
| Hendrickson, 2021 | No athlete had new symptoms or any problems after resuming exercise or during competition.                                                                                                                                                                                                                                                                                                                                                                                                                                                               |
| Hull, 2021        | 21 (14%) athletes had symptoms > 28 days and 5 (3%) had symptoms lasting > 90 days.<br>Fatigue (71%), cough (57%), headache (52%), fever (43%), dyspnea (38%), sore throat (29%), anosmia/dysgeusia (24%), myalgia (19%), chest pain (10%), diarrhea (5%), nausea (5%), dizziness (5%), abdominal pain (5%)                                                                                                                                                                                                                                              |
| Hwang, 2021       | All student-athletes have returned to exercise and athletic activity without complication.                                                                                                                                                                                                                                                                                                                                                                                                                                                               |
| Komici, 2021      | 19 (79%) had persistent symptoms.<br>Anosmia/dysgeusia (46%), rhinitis (21%), cough (17%), and myalgia (8%)                                                                                                                                                                                                                                                                                                                                                                                                                                              |
| Krzywański, 2022  | 20 (18%) athletes reported abnormal symptom at the medical screening.<br>Median (range) time between COVID-19 diagnosis and medical screening: 20 (12 – 68) days<br>Anosmia/dysgeusia (6%), feeling of decreased exercise tolerance (3%), headache (1%)                                                                                                                                                                                                                                                                                                  |
| Milovancev, 2021  | Participants had no residual symptoms of COVID-19 in the moment of testing.                                                                                                                                                                                                                                                                                                                                                                                                                                                                              |
| Petek, 2021       | 44 (1.2%) athletes had persistent symptoms > 3 weeks from symptom onset; 137 (4%) athletes had exertional cardiopulmonary symptoms on return to exercise.<br>Persistent symptoms: Anosmia/dysgeusia (63%), shortness of breath (20%), cough (15%), chest pain (15%), fatigue (10%), headache (5%), loss of appetite (3%), nasal congestion (3%), rhinorrhea (3%), light-headedness (3%).<br>Exertional symptoms on return to exercise: short of breath (58%), chest pain (36%), exercise intolerance (23%), palpitations (7%), pre-syncope/syncope (4%). |
| Shah, 2021        | None of the athletes reported persistent or recurrent symptoms, limitations, or adverse events following resumption of training.                                                                                                                                                                                                                                                                                                                                                                                                                         |
