# Supplementary material
Source: HighWire-hosted journal article supplement (https://bjsm.bmj.com/content/bjsports-2022-105583)
Supplement: inline-supplementary-material-11 [file inline-supplementary-material-11.pdf]

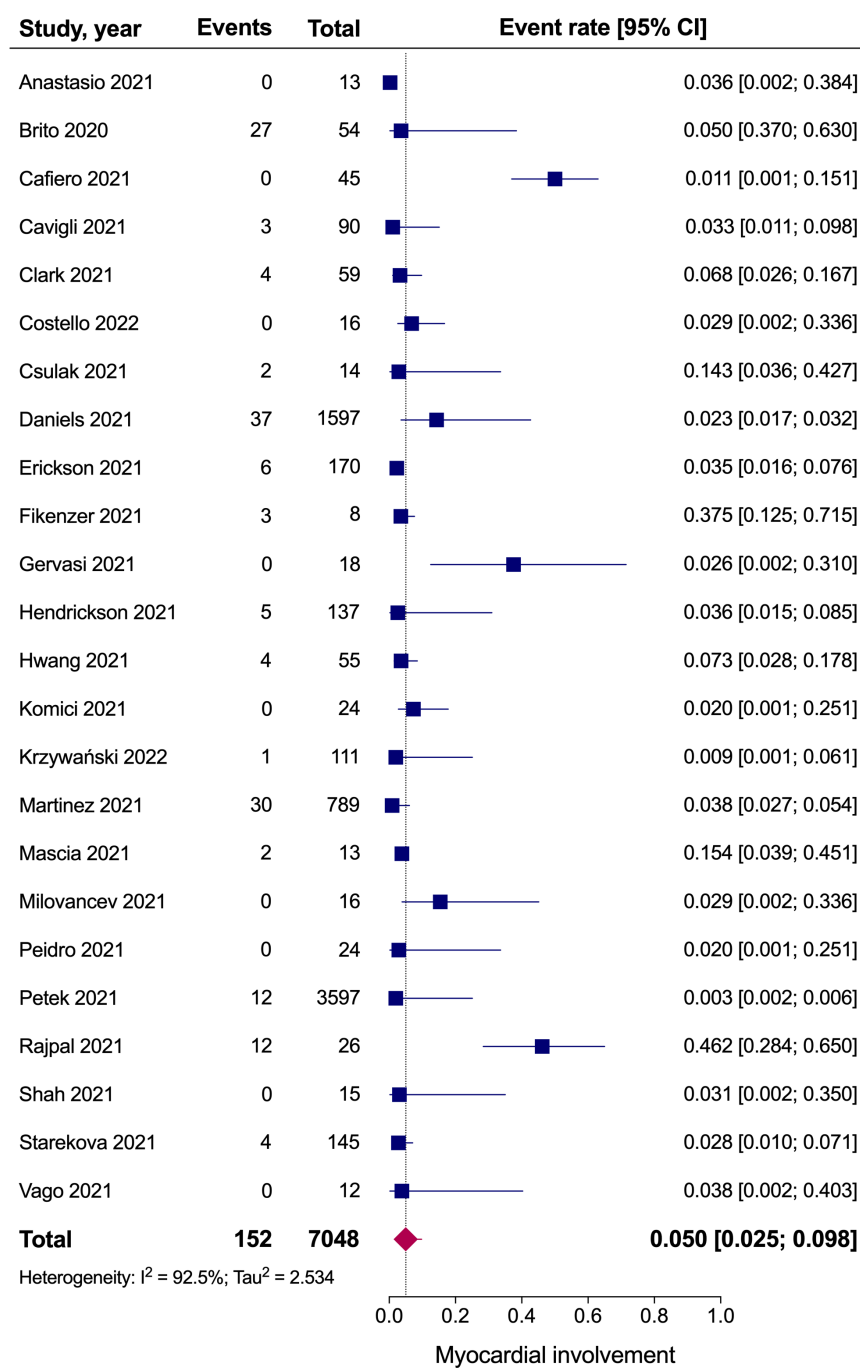

**Supplementary Figure 5.** Pooled event rate [95% CI] for myocardial involvement.

Myocardial involvement includes abnormal myocardium manifest by electrocardiographic (ECG), echocardiographic, and/or CMR imaging, with or without elevated cardiac troponin (cTn).
