# Supplementary material
Source: HighWire-hosted journal article supplement (https://bjsm.bmj.com/content/bjsports-2022-105583)
Supplement: inline-supplementary-material-12 [file inline-supplementary-material-12.pdf]

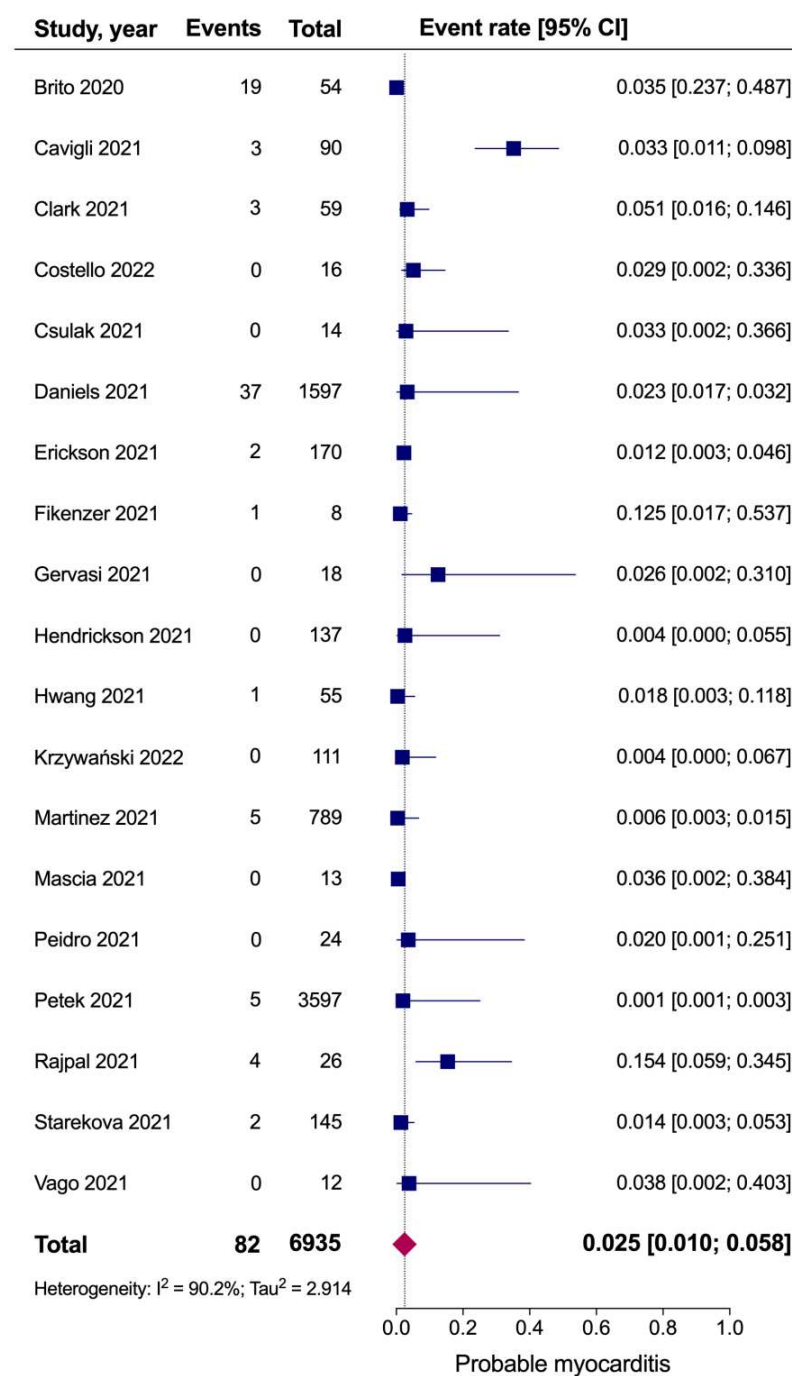

**Supplementary Figure 6.** Pooled event rate [95% CI] for myocardial involvement among studies with CMR imaging.
