# Supplementary material
Source: HighWire-hosted journal article supplement (https://bjsm.bmj.com/content/bjsports-2022-105583)
Supplement: inline-supplementary-material-13 [file inline-supplementary-material-13.pdf]

**Supplementary Table 10.** Post-acute COVID-19 myocardial involvement (continue).

| Study, year     | Type of assessments                                                                                                          | Time of assessments                                                                                            | Control group | Findings                                                                                                                                                                                                             |
|-----------------|------------------------------------------------------------------------------------------------------------------------------|----------------------------------------------------------------------------------------------------------------|---------------|----------------------------------------------------------------------------------------------------------------------------------------------------------------------------------------------------------------------|
| Anastasio, 2021 | ECG, echocardiography, blood samples, pulmonary function testing, CPET, bio-electrical impedance analysis                    | On average between 4-6 weeks after initial diagnosis of COVID-19                                               | Yes           | COVID-19 athletes had reduced aerobic threshold in comparison to controls. The remaining CPET parameters were not different between groups, and there was no difference in resting pulmonary and cardiac examination |
| Brito, 2020     | Troponin-I, ECG, echocardiography, CMR imaging                                                                               | Median time interval from tests performed to the imaging assessment 27 (22 - 33) days                          | No            | Pericardial involvement (n = 13; 27.1%)<br>Myocardial involvement (n = 8; 16.7%)<br>Myopericardial involvement (n = 6; 12.5%)                                                                                        |
| Cafiero, 2021   | Lung function tests, CPET, echocardiography, blood chemistry                                                                 | The average time taken by patients to undergo the tests compared to the days of negative swab was 70 ± 45 days | No            | All results were within normal limits. No arrhythmic events or reduction in the ejection fraction were highlighted                                                                                                   |
| Cavigli, 2021   | Personal history and clinical profile, blood testing, ECG, echocardiography, CPET, CMR imaging and chest CT (when indicated) | Evaluation time from negativization:<br><15 days (41%)<br>16-30 days (13%)<br>>30 days (46%)                   | No            | Cardiac complications occurred as myopericarditis and pericarditis in 3.3% of athletes. These findings were associated with exercise-induced ventricular arrhythmias or cardiac symptoms                             |
| Clark, 2021     | Clinical examination, ECG, troponin I, echocardiography, CMR imaging                                                         | Median time from COVID-19 diagnosis to CMR imaging: 21.5 days (interquartile range, 13–37; range, 10–162)      | Yes           | 2 (3%) athletes met criteria for myocarditis;<br>1 athlete had pericarditis;<br>1 athlete developed new left ventricle dysfunction                                                                                   |

ECG, electrocardiogram; CPET, cardiopulmonary exercise testing; CMR, cardiac magnetic resonance; CT, computed tomography; LGE, late gadolinium enhancement

**Supplementary Table 10.** Post-acute COVID-19 myocardial involvement (continue).

| Study, year    | Type of assessments                                                                                                                                       | Time of assessments                                                                                                 | Control group | Findings                                                                                                                                                                                                                                            |
|----------------|-----------------------------------------------------------------------------------------------------------------------------------------------------------|---------------------------------------------------------------------------------------------------------------------|---------------|-----------------------------------------------------------------------------------------------------------------------------------------------------------------------------------------------------------------------------------------------------|
| Costello, 2022 | Biochemistry (cardiac troponin I, B-type natriuretic peptide), ECG, echocardiography, Holter, CPET, Flow-mediated dilatation, CMR imaging                 | Evaluation was performed between 10 and 21 days from the time of testing positive to COVID-19                       | Yes           | No differences in imaging parameters and a lack of association with abnormalities on biochemistry, exercise testing or electrophysiology were observed.                                                                                             |
| Csulak 2021    | Laboratory tests (high-sensitive Troponin T, D-dimer), ECG, echocardiography, body composition, CPET. Chest CT and CMR imaging (in case of abnormalities) | After 10–14 days of the quarantine period                                                                           | Yes           | No pathological ECG or echocardiography finding was confirmed; 1 female athlete had atypical chest pain. Chest CT showed COVID-19 pneumonia. After treatment she has not reported any further symptoms or exercise-related complaints               |
| Daniels 2021   | ECG, echocardiogram, troponin and CMR imaging                                                                                                             | Median (range) time from COVID-19 test positivity to cardiac testing and diagnosis of myocarditis 22.5 (10-77) days | No            | 37 (2.3%) athletes had either clinical or subclinical myocarditis that restricted them from training and competitive play. Estimated prevalence of myocarditis of 2.1% (95% CI, 1.1%-4.4%).                                                         |
| Erickson, 2021 | Physical examination, ECG. Troponin, echocardiography, VO <sub>2</sub> , Holter, CMR imaging, chest CT, spirometry, D-dimer (in case of abnormalities)    | The mean $\pm$ SD time between positive test result and medical screening was 22.5 $\pm$ 14.2 days                  | No            | Cardiovascular diagnostic testing was indicative of effusive viral pericarditis in 2 athletes and xiphoiditis in 1 athlete                                                                                                                          |
| Fikenzer, 2021 | ECG, echocardiography, CMR imaging, CPET (if no signs of myocarditis), spirometry                                                                         | 19 $\pm$ 7 days after the first positive PCR test                                                                   | Yes           | LGE was present in two athletes. No athlete reached all Lake-Louis criteria for the diagnosis of acute myocarditis; One athlete exhibited a pericardial effusion in echocardiography and CMR imaging, which declined in the subsequent examinations |

ECG, electrocardiogram; CPET, cardiopulmonary exercise testing; CMR, cardiac magnetic resonance; CT, computed tomography; LGE, late gadolinium enhancement

**Supplementary Table 10.** Post-acute COVID-19 myocardial involvement (continue).

| Study, year       | Type of assessments                                                                                                                                                                              | Time of assessments                                                                        | Control group | Findings                                                                                                                                                                                                                                       |
|-------------------|--------------------------------------------------------------------------------------------------------------------------------------------------------------------------------------------------|--------------------------------------------------------------------------------------------|---------------|------------------------------------------------------------------------------------------------------------------------------------------------------------------------------------------------------------------------------------------------|
| Gervasi, 2021     | Physical examination, blood tests, spirometry, ECG, echocardiogram, Holter, chest CT. CMR imaging (when indicated)                                                                               | At least 15 days from clinical resolution                                                  | Yes           | There were no signs of cardiovascular impairment after clinical resolution.                                                                                                                                                                    |
| Hendrickson, 2021 | ECG, echocardiography, troponin I, and CMR imaging (in case of abnormalities)                                                                                                                    | Median time to evaluation was 16 days (interquartile range, 12–34)                         | No            | CMR evaluations after an abnormal screening, which were almost all elevated cTn, demonstrated no imaging evidence consistent with myocardial injury or myocarditis                                                                             |
| Hwang, 2021       | ECG, troponin-I, echocardiography, sports cardiologist consultation. CMR imaging, ambulatory rhythm monitoring, and CPET with exercise ECG were at the discretion of the consulting cardiologist | After a ten-day isolation period or upon return to campus                                  | Yes.          | The rate of cardiac involvement appeared low. Two athletes received new cardiac diagnoses, one probable early cardiomyopathy and one pericarditis                                                                                              |
| Komici, 2021      | Spirometry, echocardiography, cardiopulmonary exercise testing                                                                                                                                   | After ending self-isolation and confirmation of negative laboratory results                | Yes           | Cardiorespiratory function was not significantly altered in post-COVID-19 athletes both at rest and during exercise. Post COVID-19 athletes showed a reduction in FEV1%, but ventilatory efficiency and overall performance were not impaired. |
| Krzywański 2022   | ECG, whole blood count, C-reactive protein), high-sensitive troponin T, CMR imaging and chest CT                                                                                                 | Median (range) time between diagnosis of COVID-19 and medical screening<br>20 (12-68) days | No            | The CMR imaging identified no cases of active myocarditis or pericarditis. There were also no signs of fibrosis suggesting prior myocarditis or structural heart diseases                                                                      |

ECG, electrocardiogram; CPET, cardiopulmonary exercise testing; CMR, cardiac magnetic resonance; CT, computed tomography; LGE, late gadolinium enhancement

**Supplementary Table 10.** Post-acute COVID-19 myocardial involvement (continue).

| Study, year      | Type of assessments                                                                                                                  | Time of assessments                                                                                                                                                                | Control group | Findings                                                                                                                                             |
|------------------|--------------------------------------------------------------------------------------------------------------------------------------|------------------------------------------------------------------------------------------------------------------------------------------------------------------------------------|---------------|------------------------------------------------------------------------------------------------------------------------------------------------------|
| Martinez, 2021   | Blood test (troponin), ECG, echocardiography, and CMR imaging and stress echocardiography (in case of abnormalities)                 | Testing was performed a mean (SD) of 19 (17) days (range, 3-156 days) after a positive test result                                                                                 | No            | 0.6% (5/789) had imaging findings suggestive of inflammatory heart disease (0.4% [3/789] myocarditis and 0.3% [2/789] pericarditis)                  |
| Mascia, 2021     | Blood test, clinical examination, ECG, echocardiography, CPET, Holter, and CMR imaging (in case of elevated high-sensitive troponin) | CMR imaging was performed at 27–41 days after COVID-19 diagnosis                                                                                                                   | Yes           | All athletes with abnormal high-sensitive troponin (15%; 2/13) underwent CMR imaging, that excluded any cardiac injury                               |
| Milovancev, 2021 | Pulmonary function, ECG, CPET                                                                                                        | NR                                                                                                                                                                                 | No            | CPET and pulmonary function data can be classified as standard for their age and level of competition. ECG testing revealed no cardiac abnormalities |
| Moulson, 2021    | Clinical assessment, ECG, troponin, echocardiography, CMR imaging                                                                    | Median (IQR) time from initial infection to cardiac testing:<br><br>CMR: 33 (18-63) days<br>Echocardiography: 15 (11-25) days<br>Troponin: 12 (10-17) days<br>ECG: 12 (10-16) days | No            | Definite, probable, or possible SARS-CoV-2 cardiac involvement was identified in 0.7% (21/3018) athletes                                             |

ECG, electrocardiogram; CPET, cardiopulmonary exercise testing; CMR, cardiac magnetic resonance; CT, computed tomography; LGE, late gadolinium enhancement

**Supplementary Table 10.** Post-acute COVID-19 myocardial involvement (continue).

| Study, year  | Type of assessments                                                                                                                                                                            | Time of assessments                                                                                                                                                                   | Control group | Findings                                                                                                                                                                                                                                                                                                                                                                                                                                                                                                                                                                                                               |
|--------------|------------------------------------------------------------------------------------------------------------------------------------------------------------------------------------------------|---------------------------------------------------------------------------------------------------------------------------------------------------------------------------------------|---------------|------------------------------------------------------------------------------------------------------------------------------------------------------------------------------------------------------------------------------------------------------------------------------------------------------------------------------------------------------------------------------------------------------------------------------------------------------------------------------------------------------------------------------------------------------------------------------------------------------------------------|
| Peidro, 2021 | ECG, Doppler echocardiography, CMR imaging                                                                                                                                                     | At least 10 days after COVID-19 diagnosis or disappearance of symptoms (18-22 days for CMR)                                                                                           | No            | ECG and echocardiographic examinations did not reveal heart disease. CMRs showed ventricular thicknesses and volumes consistent with high-performance athletes. No late enhancement after gadolinium injection.                                                                                                                                                                                                                                                                                                                                                                                                        |
| Petek, 2021  | ECG, troponin, echocardiogram, CMR imaging, cardiac stress testing, cardiopulmonary exercise testing, chest X-ray, coronary CT angiography, CT-PE protocol, Holter, pulmonary function testing | Median time from initial infection (symptom onset or positive SARS-CoV-2 test) to return to exercise 17 (13–21) days<br><br>Median time from initial infection to CMR 44 (29–70) days | No            | No diagnosis of SARS-CoV-2-associated sequelae was made following clinical evaluation or advanced diagnostic testing in athletes with only persistent symptoms;<br><br>8.8% (12/137) of athletes with exertional cardiopulmonary symptoms on return to exercise had SARS-CoV-2-associated sequelae (5 cardiac involvement, 2 pneumonia, 2 inappropriate sinus tachycardia, 2 postural orthostatic tachycardia syndrome and 1 pleural effusion);<br><br>In athletes who had chest pain on return to exercise and underwent CMR (n=24), probable or definite SARS CoV-2 cardiac involvement was found in 20.8% of cases; |
| Rajpal, 2021 | ECG, troponin I, echocardiography, CMR imaging                                                                                                                                                 | Cardiac magnetic resonance imaging was performed after recommended quarantine (11-53 days)                                                                                            | No            | 4 (15%) had CMR findings suggestive of myocarditis and 8 additional athletes (30.8%) exhibited LGE without T2 elevation suggestive of prior myocardial injury                                                                                                                                                                                                                                                                                                                                                                                                                                                          |
| Shah, 2021   | Physical examination, ECG, echocardiography, high-sensitive troponin I, pulmonary function, cardiology consultation, CMR imaging (in case of abnormalities)                                    | NR                                                                                                                                                                                    | Yes           | No cardiopulmonary pathology attributable to COVID-19 was detected                                                                                                                                                                                                                                                                                                                                                                                                                                                                                                                                                     |

ECG, electrocardiogram; CPET, cardiopulmonary exercise testing; CMR, cardiac magnetic resonance; CT, computed tomography; LGE, late gadolinium enhancement

**Supplementary Table 10.** Post-acute COVID-19 myocardial involvement (continued).

| Study, year     | Type of assessments                                                                                                                                                             | Time of assessments                                                                                                                     | Control group | Findings                                                                                                                                                                                                                                                                                                                                  |
|-----------------|---------------------------------------------------------------------------------------------------------------------------------------------------------------------------------|-----------------------------------------------------------------------------------------------------------------------------------------|---------------|-------------------------------------------------------------------------------------------------------------------------------------------------------------------------------------------------------------------------------------------------------------------------------------------------------------------------------------------|
| Starekova, 2021 | Clinical data, ECG, echocardiography, troponin-I, B-type natriuretic peptide, C-reactive protein, erythrocyte sedimentation rate, CMR imaging, chest radiography (if performed) | Median (range) from positive COVID-19 test result to CMR imaging 15 (11-194) days                                                       | No            | CMR imaging findings consistent with myocarditis = 2 (1.4%):<br><br>1 patient had marked nonischemic LGE and T2-weighted signal abnormalities over multiple segments, along with an abnormal serum troponin-I level;<br>1 patient had 1-cm nonischemic mild LGE and mild T2-weighted signal abnormalities, with normal laboratory values; |
| Vago, 2021      | Laboratory tests (high-sensitive troponin T, C-reactive protein, N-terminal pro-B-type natriuretic protein), CMR imaging                                                        | Median time from positive PCR to CMR was 17 (IQR 17-19) days in 10 female athletes, and 67 and 90 days in 2 male athletes, respectively | Yes           | No signs of cardiac involvement on CMR                                                                                                                                                                                                                                                                                                    |

ECG, electrocardiogram; CPET, cardiopulmonary exercise testing; CMR, cardiac magnetic resonance; CT, computed tomography; LGE, late gadolinium enhancement
